# Supplementary material for: Riverine Litter Flux to the Northeastern Part of the Black Sea
Source: MDPI journal article supplement (doi:10.3390/jmse11010105), 2023-01-04
Supplement: s1 [file s1]

**Table S1** presents data from the first observation on the Don River, conducted on September 3, 2016. Apart from basic data like observation ID (Obs. ID), observer initials (Obs. Init.), observation organization (Obs. Org.), classification of water area (River/Sea) and its name (Name), it contains other relative data, like speed of river flow (Flow speed (m/s)), observation width (Obs. Width (m)), weather during observation (Weather), observation track width (Obs. Track width (m)), observation height (Obs. Height (m)), additional weather description (Weather description), observation data and time (Data, time), geographical position of observation (Lat. (deg), Lon. (deg)), litter item and size from standardized categorization list (Litter item, Litter size). Part of the data intentionally is not specified (Obs. ID, Obs. Init., Obs. Org.) and replaced with “-“.

**Table S1.** Data from the first observation on the Don River (an example), conducted on September 3, 2016.

Observation ID (Obs. ID), observer initials (Obs. Init.), observation organization (Obs. Org.), classification of water area (River/Sea) and its name (Name), speed of river flow (Flow speed (m/s)), observation width (Obs. Width (m)), weather during observation (Weather), observation track width (Obs. Track width (m)), observation height (Obs. Height (m)), additional weather description (Weather description), observation data and time (Data, time), geographical position of observation (Lat. (deg), Lon. (deg)), litter item and size from standardized categorization list (Litter item, Litter size) performed on the Don River, conducted on September 3, 2016.

| Obs. ID | Obs. Init. | Obs. Org. | River/ Sea | Name | Flow speed (m/s) | Obs. Width (m) | Weather | Obs. Track width (m) | Obs. Height (m) | Weather description | Data, time       | Lat. (deg) | Lon. (deg) | Litter item       | Litter size |
|---------|------------|-----------|------------|------|------------------|----------------|---------|----------------------|-----------------|---------------------|------------------|------------|------------|-------------------|-------------|
| -       | -          | -         | river      | Don  | -                | 220            | sunny   | 70                   | 30              | -                   | 03.09.2016 17:01 | 47.22      | 39.67      | -                 | -           |
| -       | -          | -         | river      | Don  | -                | 220            | sunny   | 70                   | 30              | -                   | 03.09.2016 17:07 | 47.22      | 39.72      | Cover / packaging | 2.5–5cm     |
| -       | -          | -         | river      | Don  | -                | 220            | sunny   | 70                   | 30              | -                   | 03.09.2016 17:14 | 47.22      | 39.72      | Foam              | 2.5–5cm     |
| -       | -          | -         | river      | Don  | -                | 220            | sunny   | 70                   | 30              | -                   | 03.09.2016 17:14 | 47.22      | 39.72      | Leaves            | 5–10cm      |
| -       | -          | -         | river      | Don  | -                | 220            | sunny   | 70                   | 30              | -                   | 03.09.2016 17:22 | 47.21      | 39.72      | Paper packaging   | 5–10cm      |
| -       | -          | -         | river      | Don  | -                | 220            | sunny   | 70                   | 30              | -                   | 03.09.2016 17:24 | 47.21      | 39.72      | Leaves            | 5–10cm      |
| -       | -          | -         | river      | Don  | -                | 220            | sunny   | 70                   | 30              | -                   | 03.09.2016 17:30 | 47.21      | 39.72      | Other wood        | 5–10cm      |
| -       | -          | -         | river      | Don  | -                | 220            | sunny   | 70                   | 30              | -                   | 03.09.2016 17:33 | 47.21      | 39.72      | Leaves            | 5–10cm      |
| -       | -          | -         | river      | Don  | -                | 220            | sunny   | 70                   | 30              | -                   | 03.09.2016 17:34 | 47.21      | 39.72      | -                 | -           |
