# Supplementary material for: Riverine Litter Flux to the Northeastern Part of the Black Sea
Source: MDPI journal article supplement (doi:10.3390/jmse11010105), 2023-01-04
Supplement: s1 [file s1]

Archive with 1 entries (1 files):
- jmse-2031513-supplementary.pdf
